# Supplementary material for: A RhoA–YAP–c-Myc signaling axis promotes the development of polycystic kidney disease
Source: PubMed Central journal article supplement — Genes Dev. 2018 Jun 1;32(11-12):781–93. doi: 10.1101/gad.315127.118 (PMC6049514; doi:10.1101/gad.315127.118), 2018-06-01

## **Supplementary Tables and Figures**

### **Table S1. Expression analysis of known YAP/TAZ/TEAD target genes in human ADPKD cysts, minimally cystic tissues (MCT) and normal kidneys (KIDNEY).**

The Excel file shows the raw data for the expression of a previously reported set of 379 YAP/TAZ/TEAD direct target genes and the relative fold change of expression in human ADPKD cysts relative to minimally cystic tissues or normal kidneys.

### **Table S2. A summary of YAP/TAZ/TEAD direct target genes with altered expression in human ADPKD cysts versus minimally cystic tissues (MCT).**

The Excel file shows the raw data for the expression of 203 YAP/TAZ/TEAD direct target genes and the relative fold change of expression in human ADPKD cysts relative to minimally cystic tissues.

### **Table S3. A summary of animals used for phenotypic analyses in this study.**

The Excel file shows the genotype, age, gender, treatment, kidney weight, body weight, and the ratio of kidney over body weight for each animal analyzed.

**Table S4. PCR Primers and site-directed mutagenesis**

| <b>Real time PCR primer</b> | <b>Sequence</b>                |                                |
|-----------------------------|--------------------------------|--------------------------------|
| c-Myc forward               | CCTTTGGGCGTTGGAAACC            |                                |
| c-Myc reverse               | CGTCGCAGATGAAATAGGG            |                                |
| Cyr61 forward               | GCTCAGTCAGAAGGCAGACC           |                                |
| Cyr61 reverse               | GTTCTTGGGGACACAGAGGA           |                                |
| Ctgf forward                | AGTGTGCACTGCCAAAGATG           |                                |
| Ctgf reverse                | CCAGGCAAGTGCATTGGTAT           |                                |
| Col12A1 forward             | AAGTTGACCCACCTTCCGAC           |                                |
| Col12A1 reverse             | GGTCCACTGTTATTCTGTAACCC        |                                |
| Amotl2 forward              | AGGGACAATGAGCGATTGCAG          |                                |
| Amotl2 reverse              | CCTCACGCTTGGAAAGAGGT           |                                |
| Axl forward                 | ATGGCCGACATTGCCAGTG            |                                |
| Axl reverse                 | CGGTAGTAATCCCCGTTGTAGA         |                                |
| Gapdh forward               | CCCAATGTGTCCGTCGTGGAT          |                                |
| Gapdh reverse               | TGTAGCCCAAGATGCCCTTCAG         |                                |
| <b>ChIP PCR primer</b>      |                                |                                |
|                             | <b>Sequence</b>                |                                |
| Site 1 forward              | TGAGGTTCTGGGCACTGTGA           |                                |
| Site 1 reverse              | CTTCCAGAAGATCCTAGTC            |                                |
| Site 2 forward              | TGTAGGTAGAGTGGCACAGG           |                                |
| Site 2 reverse              | GGACAGGAAAGCCACAAGTT           |                                |
| Site 3 forward              | GATTGGTGGCTCTTGGTGTT           |                                |
| Site 3 reverse              | GCCACTGAGTTTGCAATTTAGG         |                                |
| Site 4 forward              | GGGGTCGTTCTGGAAAGAAT           |                                |
| Site 4 reverse              | AGCAACTCACTGCCACGTAT           |                                |
| Site 5 forward              | CCATTCCTGTGCTTTTGACA           |                                |
| Site 5 reverse              | GGTTTTCCCTTCCCCTTTC            |                                |
| Site 6 forward              | TTGGGACAGGGATGTGACCG           |                                |
| Site 6 reverse              | CTCAGATCACGACTCACCGC           |                                |
| <b>Enhancer PCR primers</b> |                                |                                |
|                             | <b>Sequence</b>                |                                |
| Pro1 forward                | GGGCCGACTTGTTCATTCTA           |                                |
| Pro1 reverse                | AAGGACAGGAAAGCCACAAG           |                                |
| Pro2 forward                | GATTGGTGGCTCTTGGTGTT           |                                |
| Pro2 reverse                | TGCAGGAAAACGATGTCTG            |                                |
| Int1 forward                | CTGGTGGTCTTTCCCTGTGT           |                                |
| Int1 reverse                | GGGAGGGGGTGTCAAATAAT           |                                |
|                             | <b>Original sequence</b>       | <b>Mutagenesis sequence</b>    |
| Site 1                      | GTAAGAGGG <u>GAAT</u> GTACTCTC | GTAAGAGGG <u>GATCCT</u> ACTCTC |
| Site 2                      | AACAAGA <u>ACATTCCA</u> ATCAC  | AACAAGA <u>ACATGTCA</u> ATCAC  |
| Site 5                      | CTTTCTTCC <u>ATT</u> CCTGTGCT  | CTTTCTTCC <u>ATGGCT</u> GTGCT  |
| Site 6                      | GAATCCTCC <u>ATT</u> CCTACTTG  | GAATCCTCC <u>ATGGCT</u> ACTTG  |

**Figure S1. Activity of the *AhCre* driver in the kidney.**

(A)  $\beta$ -galactosidase staining in P12 *Rosa26LacZ/+* kidneys. Scale bars, 100  $\mu$ m.

(B)  $\beta$ -galactosidase staining in P12 *AhCre;R26RLacZ/+* kidneys without  $\beta$ -NF induction. Scale bars, 100  $\mu$ m.

(C)  $\beta$ -galactosidase staining in P12 *AhCre;R26RLacZ/+* kidneys after daily  $\beta$ -NF injections from P8 to P11. Scale bar, 100  $\mu$ m. A higher magnification view of kidney section showing LacZ-positive cells is shown to the right.

(D) Morphology of the kidneys in control (*Pkd1<sup>fllox/fllox</sup>*) and *Pkd1* mutant (*AhCre;Pkd1<sup>fllox/fllox</sup>*) mice 3 weeks after P8-P11  $\beta$ -NF injections.

(E) H&E staining of *Pkd1* mutant kidneys 3 weeks after P8-P11  $\beta$ -NF injections. Scale bar, 1 mm. A higher magnification view of kidney section is shown to the right. The arrow marks kidney cysts, while the arrowhead indicates glomerular dilation.

(F) Lectin *Lotus tetragonolobus* (LTL), Tamm-Horsfall protein (THP) and lectin *Dolichos biflorus* (DBA) staining in *Pkd1* mutant kidneys 3 weeks after  $\beta$ -NF injections. LTL, THP and DBA are segment-specific markers: LTL for the proximal tubule, THP for the thick ascending limb and distal convoluted tubule, and DBA for the collecting duct. Arrows indicate cysts in the proximal tubule (LTL-positive), the thick ascending limb and distal convoluted tubule (THP-positive) and the collecting duct (DBA-positive). Scale bar, 100  $\mu$ m.

**Figure S1**

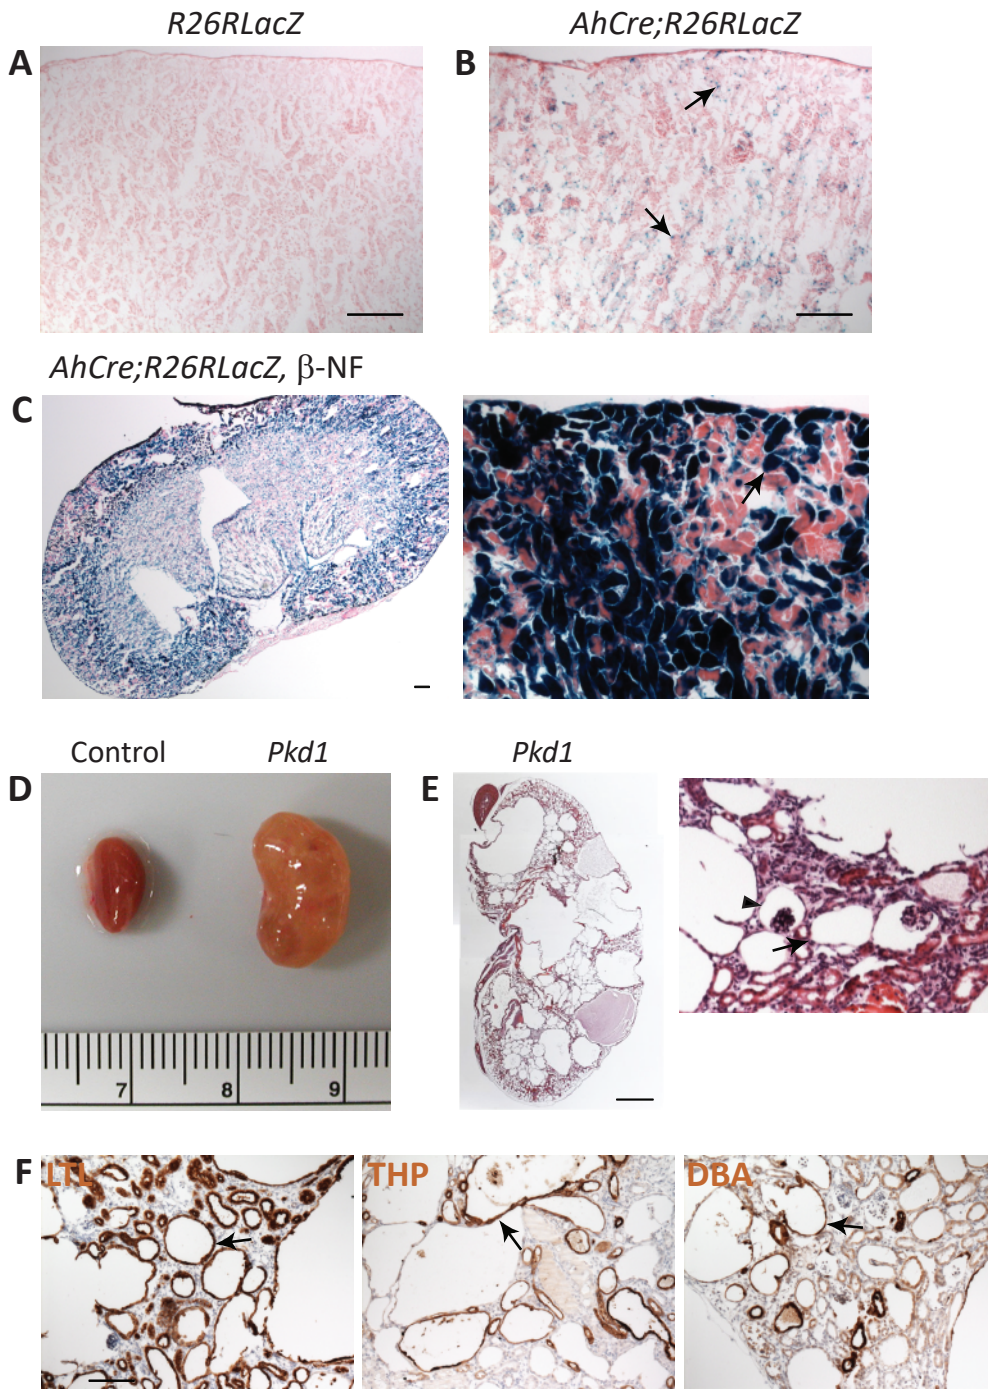

**Figure S2. YAP activation in renal tubular epithelium leads to tubule dilation in the kidney.**

(A-B) Double staining of YAP and LTL (A) and YAP and DBA (B) showing overexpressed YAP protein in the proximal tubule (LTL-positive) and the collecting duct (DBA-positive) in the kidney tubular epithelium (arrows) after doxycycline treatment of *Pax8-rtTA;pTRE2-Yap* double transgenic mice for 2 days. Scale bar, 100  $\mu\text{m}$ . A higher magnification view of kidney section is shown to the right.

(C-E) LTL (C), THP (D) and DBA (E) staining showing progression of kidney tubule dilation in the proximal tubule (LTL-positive) and the thick ascending limb and distal convoluted tubule (THP-positive), but not in the collecting duct (DBA-positive), upon YAP induction in the double transgenic mice. Tubule dilation began at 4 days after doxycycline induction and progressed to more severe phenotypes by 8 days. Arrows mark representative dilations, while arrowhead indicates a glomerular dilation. Scale bar, 100  $\mu\text{m}$ .

Figure S2

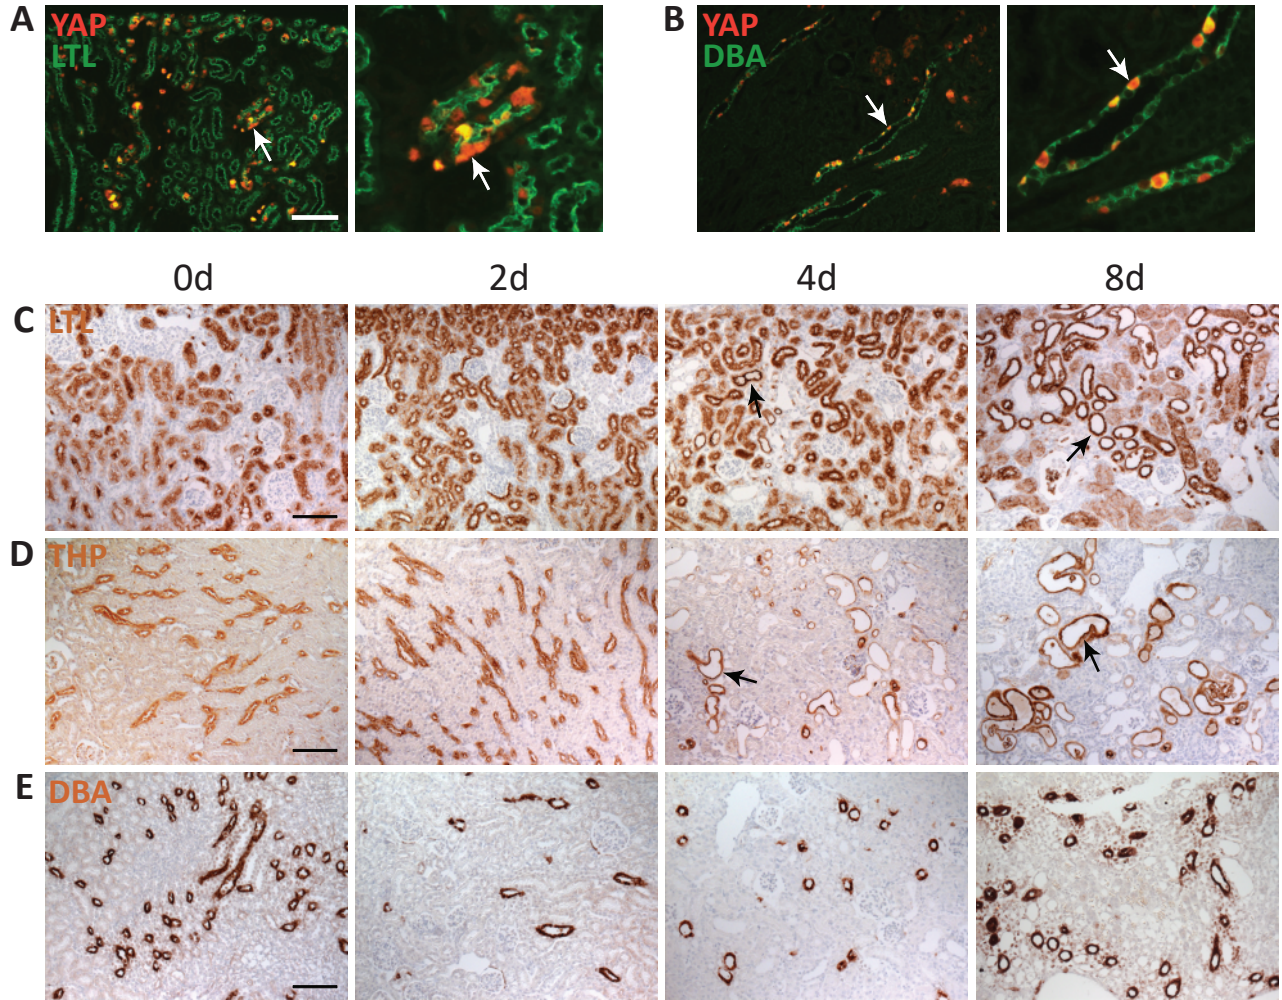

**Figure S3. Suppression of hyperproliferation and tubule dilation in *Sav1* mutant kidneys by inactivation of YAP.**

Ki67 (A), H&E (B), LTL (C), THP (D) and DBA (E) staining in control, *Sav1* mutant (*AhCre;Sav1<sup>flox/flox</sup>*), *Sav1;Yap* double mutant (*AhCre;Sav1<sup>flox/flox</sup>;Yap<sup>flox/flox</sup>*) and *Yap* mutant (*AhCre;Yap<sup>flox/flox</sup>*) kidneys 3 months after P8-P11  $\beta$ -NF injections. Arrows indicate proliferating cells (A) and dilations (B-D) in the kidney tubular epithelium, while arrowhead indicates a glomerular dilation. Note the dilations in the proximal tubule (LTL-positive) and the thick ascending limb and distal convoluted tubule (THP-positive), but not in the collecting duct (DBA-positive) in *Sav1* mutant kidney tubular epithelium. Scale bars, 100  $\mu$ m.

Figure S3

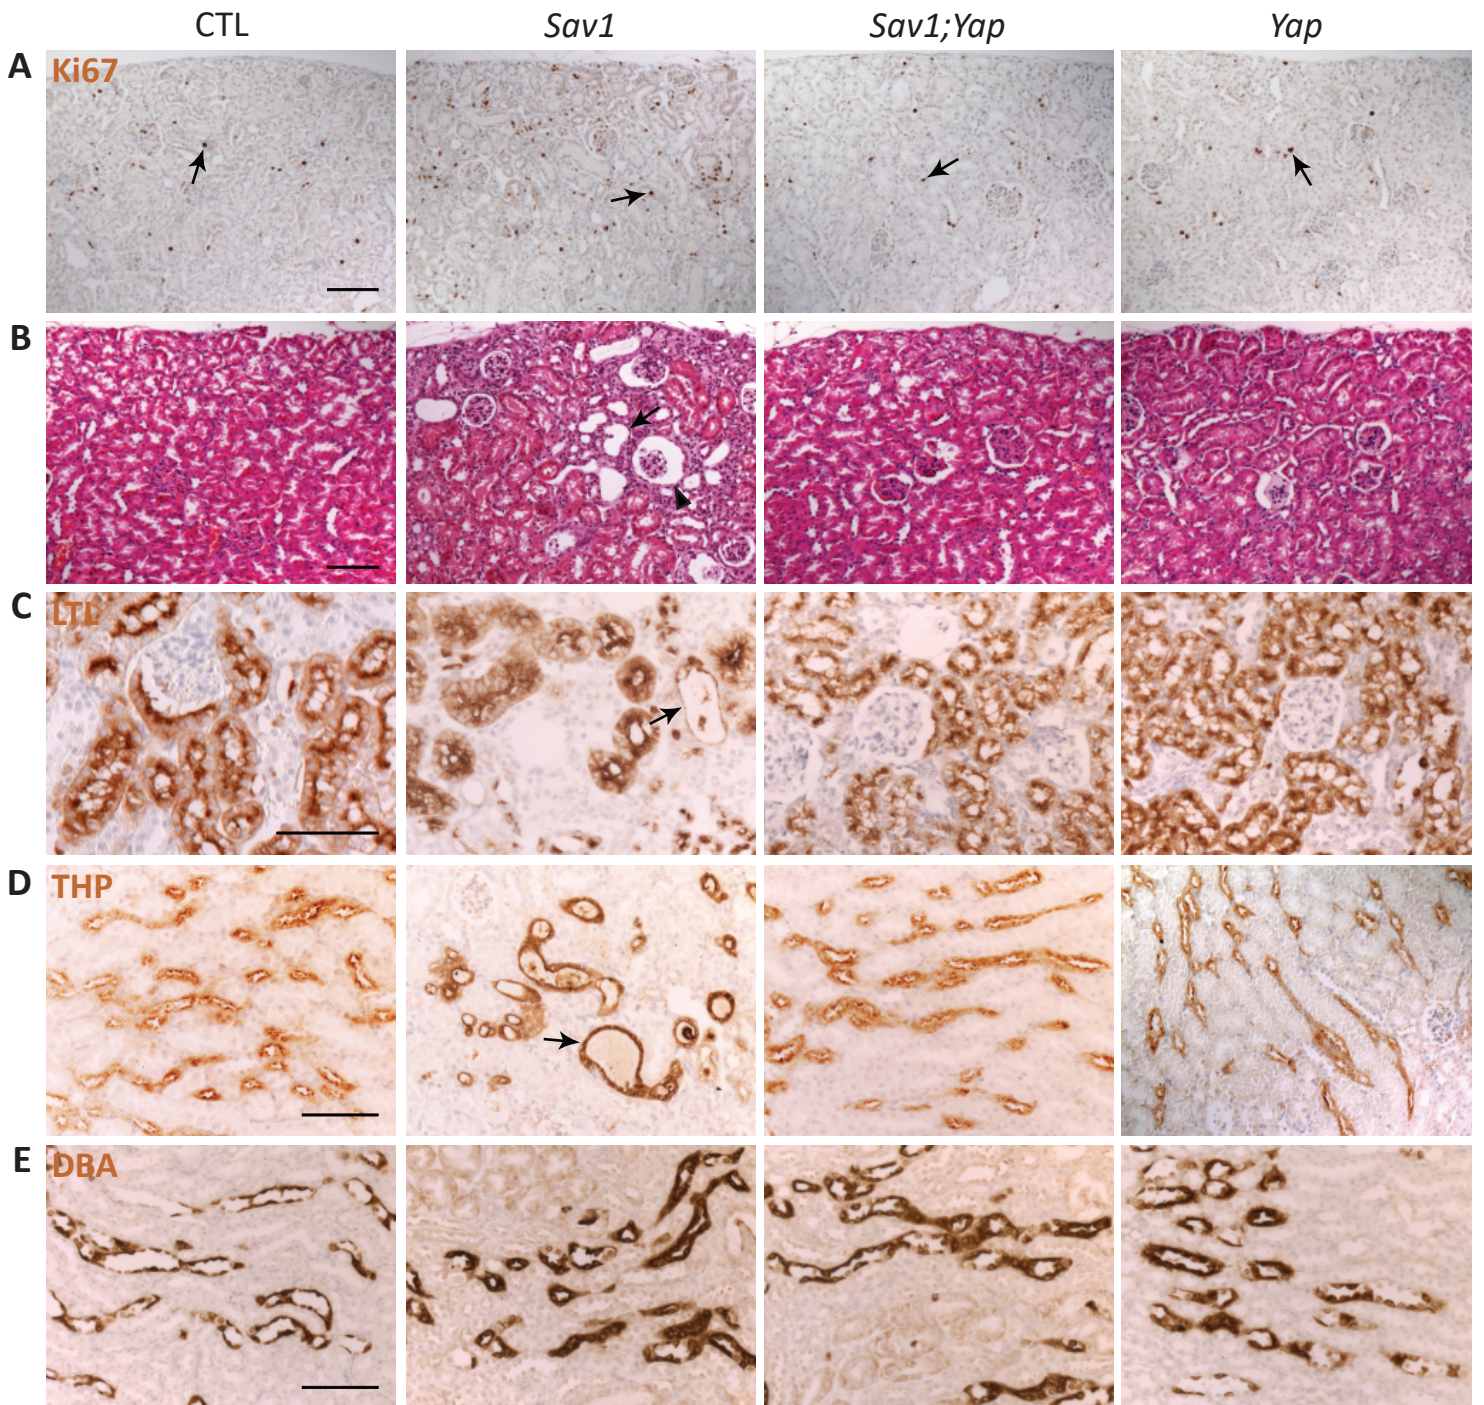



**Figure S4. *Taz* mutant mice does not show kidney phenotypes.**

(A) LTL, THP and DBA staining in the kidneys of 1-month-old *AhCre;Pkd1<sup>fllox/fllox</sup>* mice without  $\beta$ -NF induction. Arrows indicate cysts in the proximal tubule (LTL-positive), the thick ascending limb and distal convoluted tubule (THP-positive) and the collecting duct (DBA-positive). Scale bar, 100  $\mu$ m.

(B) H&E staining in the kidney of 3-month-old *Taz* mutant (*AhCre;Taz<sup>fllox/fllox</sup>*) kidneys without  $\beta$ -NF induction. Note the normal histology of *Taz* mutant kidney.

Figure S4

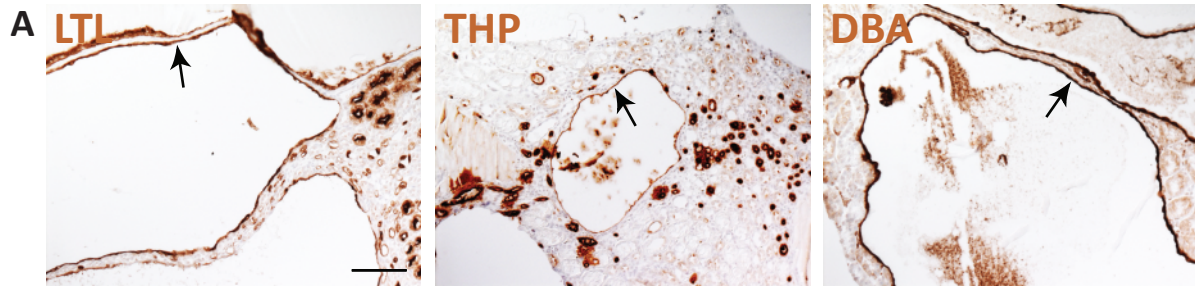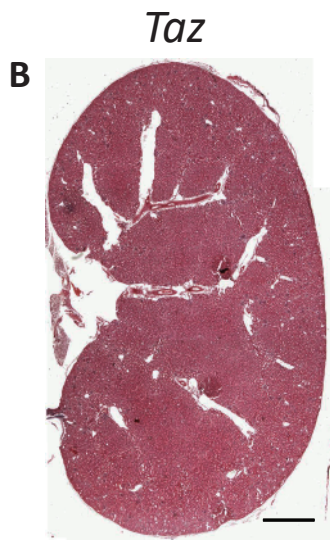

**Figure S5. *c-Myc* is a target of YAP in kidney tubular epithelium.**

(A) *c-Myc* staining in kidney tubular epithelium of control and *Pax8-rtTA;pTRE2-Yap* mice 8 days after doxycycline treatment. Note the elevated *c-Myc* staining after YAP induction. Scale bars, 100  $\mu\text{m}$ .

(B) Loss of YAP suppressed the upregulated *c-Myc* protein levels in tubular epithelium of *Sav1* mutant (*AhCre;Sav1<sup>flox/flox</sup>*) kidneys 3 months after P8-P11  $\beta$ -NF injections. Note the elevated *c-Myc* staining in *Sav1* mutant kidneys, and the normal *c-Myc* staining in control, *Sav1;Yap* double mutant (*AhCre;Sav1<sup>flox/flox</sup>;Yap<sup>flox/flox</sup>*) and *Yap* mutant (*AhCre;Yap<sup>flox/flox</sup>*) kidneys. Scale bars, 100  $\mu\text{m}$ .

(C) Loss of YAP and TAZ suppressed the *c-Myc* protein levels in kidney cysts of *Pkd1* mutant (*AhCre;Pkd1<sup>flox/flox</sup>*). Note the absence of *c-Myc* nuclear staining in *Pkd1;YAP;TAZ* triple mutant kidney cysts. Scale bars, 100  $\mu\text{m}$ .

Figure S5

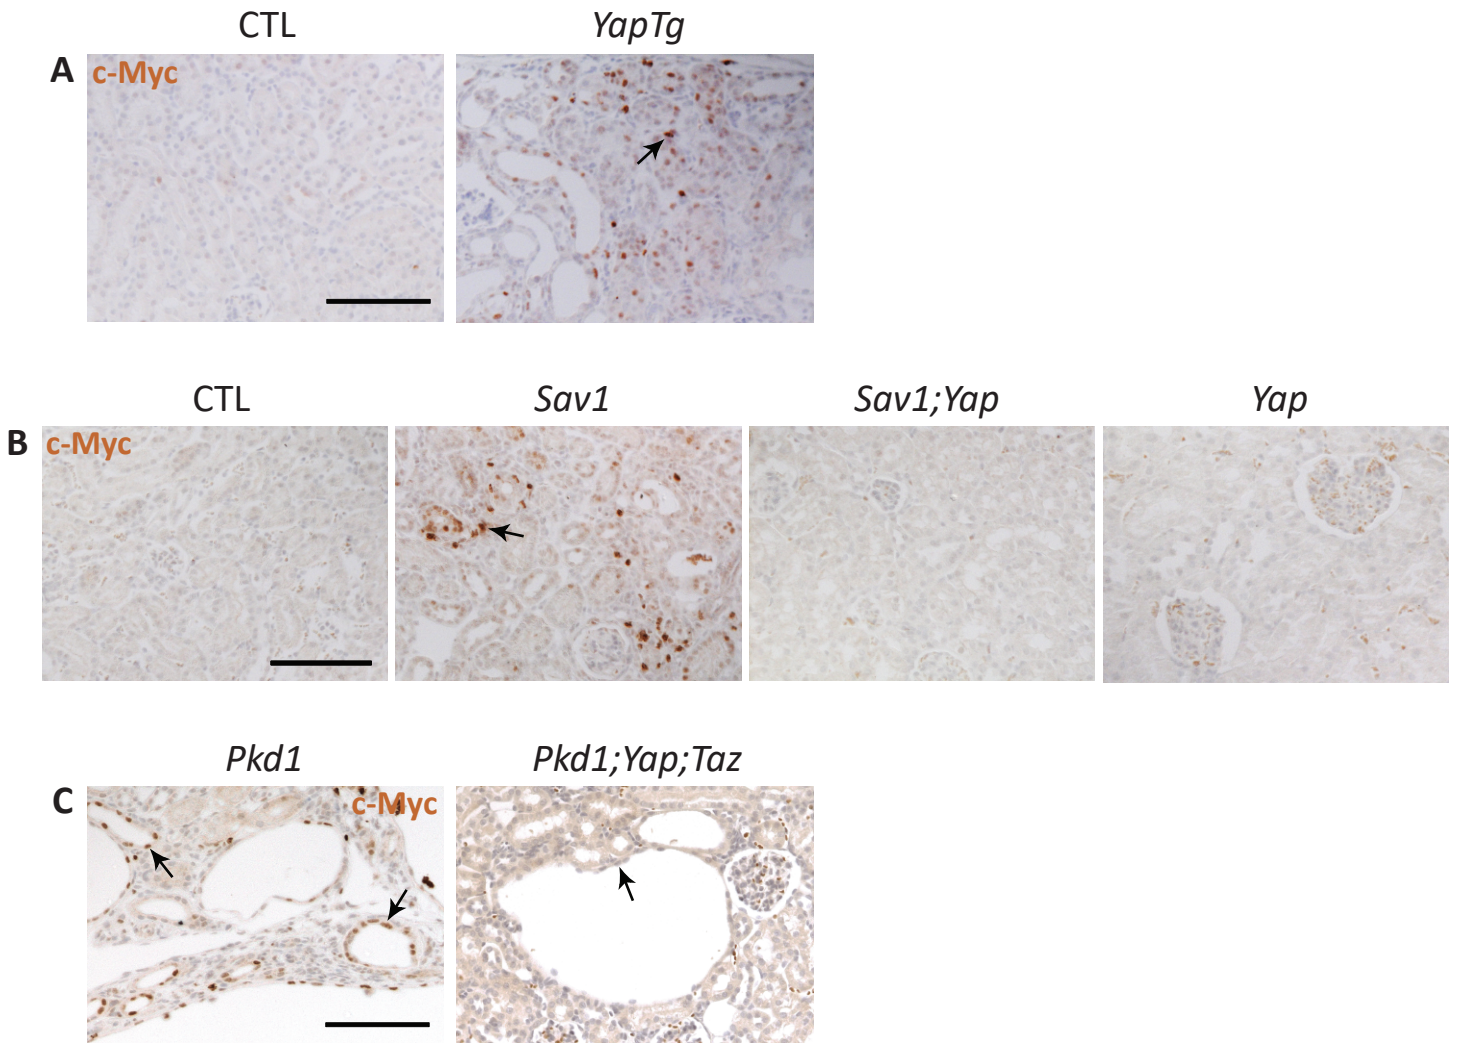

**Figure S6. Suppression of tubule dilation in *Sav1* mutant kidneys by inactivation of c-Myc.**

LTL (A), THP (B) and DBA (C) staining in control, *Sav1* mutant (*AhCre;Sav1<sup>flox/flox</sup>*), *Sav1;c-Myc* double mutant (*AhCre;Sav1<sup>flox/flox</sup>;c-Myc<sup>flox/flox</sup>*) and *c-Myc* mutant (*AhCre;c-Myc<sup>flox/flox</sup>*) kidneys 3 months after P8-P11  $\beta$ -NF injections. Arrows indicate dilations in the kidney tubular epithelium. Scale bar, 100  $\mu$ m.

Figure S6

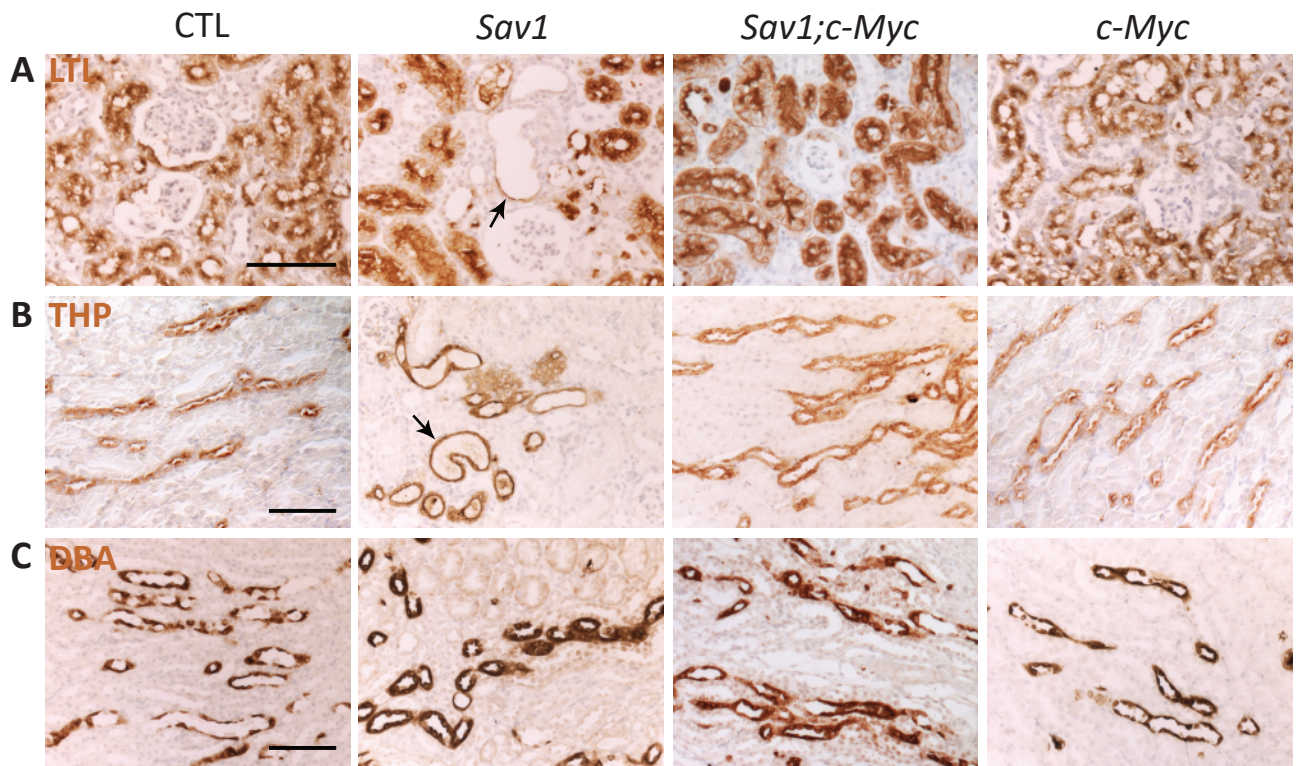

**Figure S7. Suppression of tumorigenesis in *Sav1* mutant livers by inactivation of *c-Myc*.**

(A) Quantification of liver weight (LW) over body weight (BW) in control (*Sav1<sup>fllox/fllox</sup>*) (3 mon, n=6; 12 mon, n=4), *Sav1* mutant (*AhCre;Sav1<sup>fllox/fllox</sup>*) (3 mon, n=4; 12 mon, n=5), *Sav1;c-Myc* double mutant (*AhCre;Sav1<sup>fllox/fllox</sup>;c-Myc<sup>fllox/fllox</sup>*) (3 mon, n=4; 12 mon, n=4) and *c-Myc* mutant (*AhCre;c-Myc<sup>fllox/fllox</sup>*) (3 mon, n=4; 12 mon, n=4) mice 3 and 12 months after P8-P11  $\beta$ -NF injections. Data are mean  $\pm$  SD. (\*)  $P < 0.01$ , *t*-test.

(B) Ki67 staining in control, *Sav1* mutant, *Sav1;c-Myc* double mutant and *c-Myc* mutant livers 3 months after P8-P11  $\beta$ -NF injections. Arrows indicate proliferating cells in kidney tubular epithelium. Scale bar, 100  $\mu$ m.

(C) Quantification of Ki67-positive cells in (B). Data are mean  $\pm$  SD. n = 3. (\*)  $P < 0.01$ , *t*-test.

(D-E) Morphology (D) and H&E staining (E) of control, *Sav1* mutant, *Sav1;c-Myc* double mutant and *c-Myc* mutant livers 12 months after P8-P11  $\beta$ -NF injections. Note the large tumors (D) and a disorganized parenchyma with the characteristics of hepatocellular carcinomas by histological analysis (E) in *Sav1* mutant livers and the complete suppression of tumor formation by loss of *c-Myc*. Scale bar, 100  $\mu$ m.

Figure S7

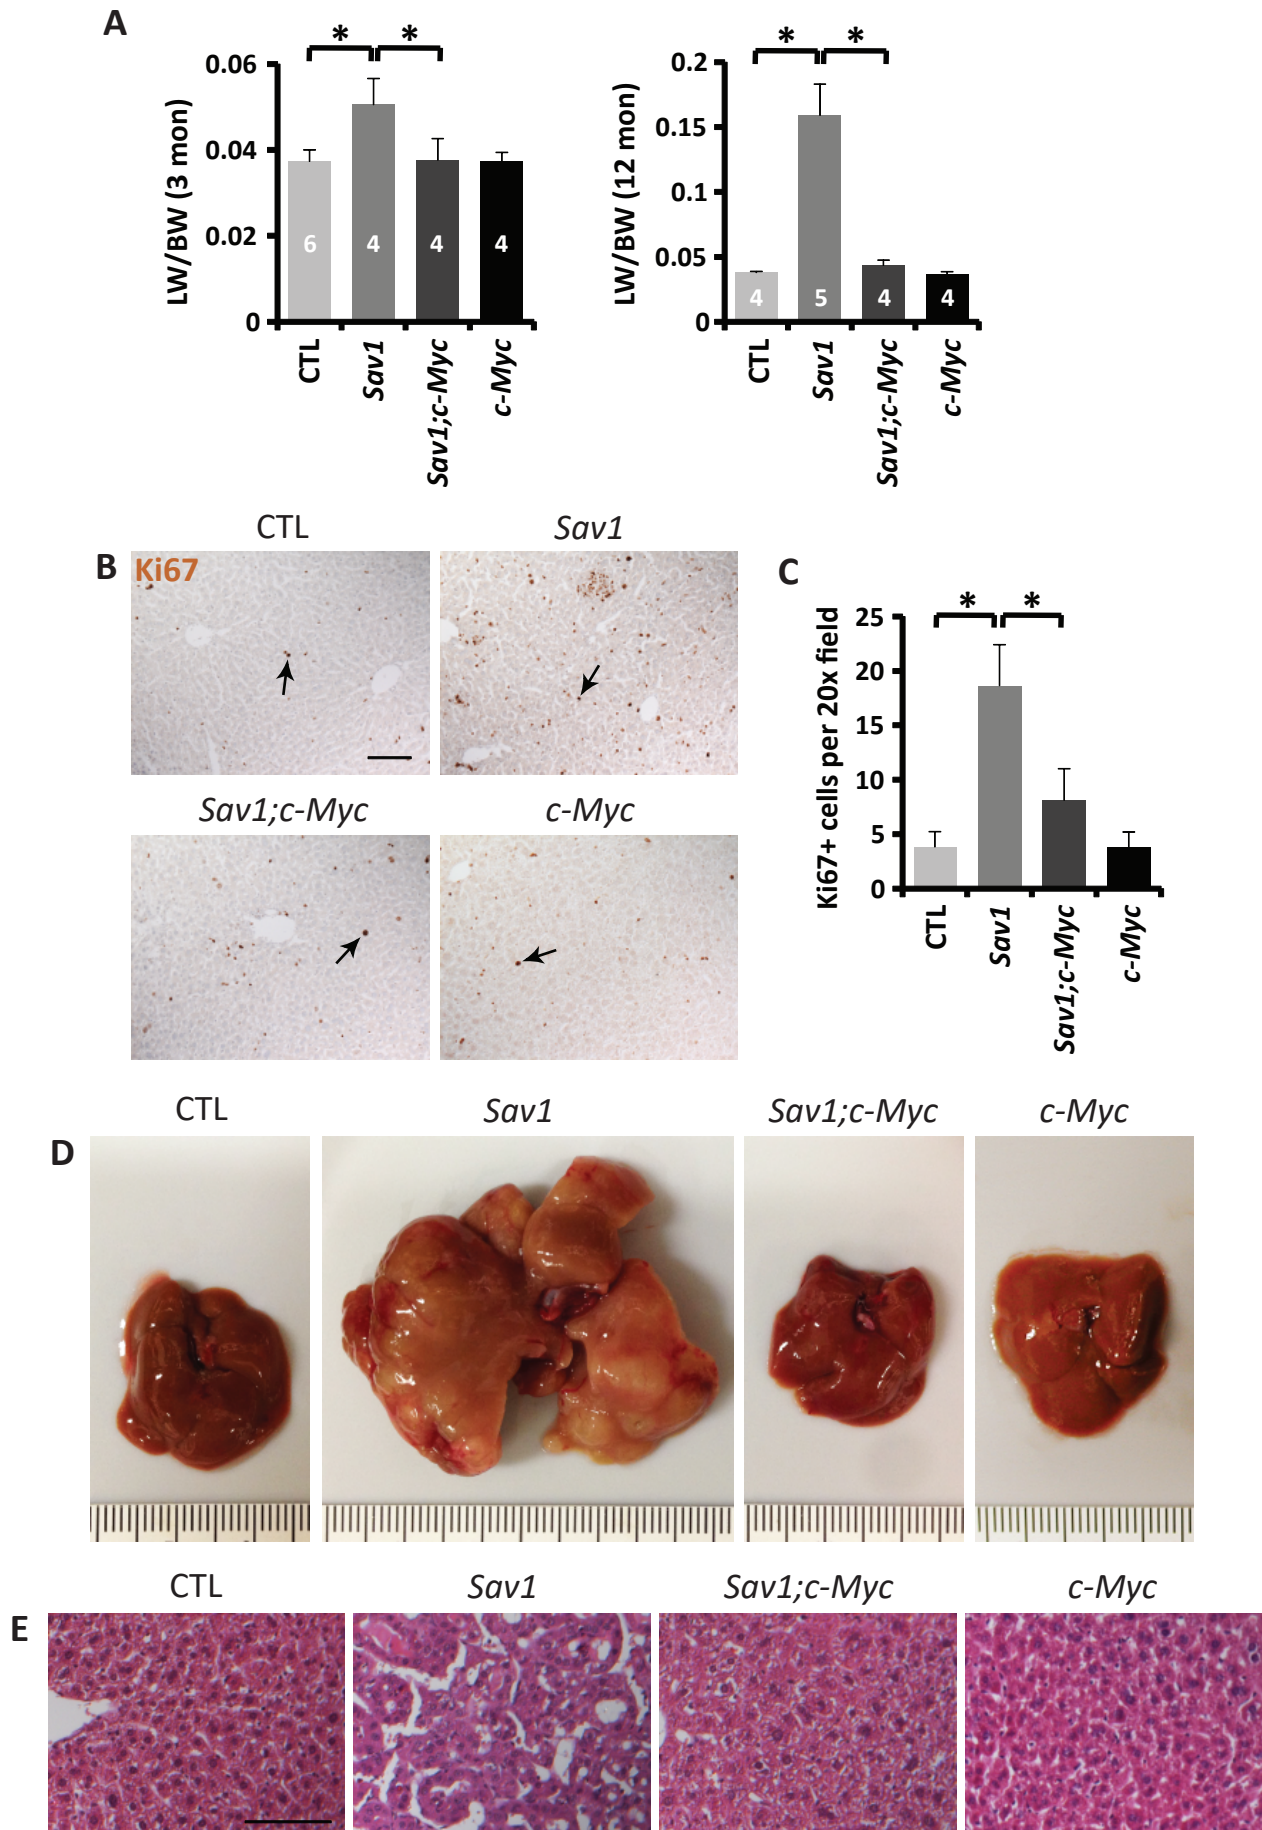



**Figure S8. Development of tubular and cystic structures in 3D-cultured mIMCD3 cells and the effect of ROCK inhibitors on *Pkd1* mutant mIMCD3 cells.**

(A) Development of tubular structures in 3D-cultured mIMCD3 cells. Tubule-forming cells initially grew into cell cords without a lumen. Lumen was first seen in cell cords after 5-6 days of culture. Red, phalloidin staining. Blue, DAPI staining. Scale bars, 100  $\mu\text{m}$ .

(B) Development of cystic structures in 3D-cultured mIMCD3 cells. Cyst-forming cells initially grew into cell aggregates without a lumen. Lumen was first seen after 3-4 days of culture in cell aggregates containing about 8 cells. Red, phalloidin staining. Blue, DAPI staining. Scale bars, 100  $\mu\text{m}$ .

(C) Quantification of the percentage of cords/tubules versus cysts in *Pkd1* mutant mIMCD3 cells (clone #1) in 3D culture for 6 days in the presence of the indicated ROCK inhibitors. Note that these ROCK inhibitors induced tubulogenesis in *Pkd1* mutant mIMCD3 cells in a dosage-dependent manner. Co, cord; Tu, tubule. Data are mean  $\pm$  SD. n=3. (\*)  $P < 0.01$ , *t*-test.

(D) Kinase target(s) of the five chemicals that induced tubulogenesis in 3D-cultured *Pkd1* mutant mIMCD3 cells. Information is taken from the commercial supplier of the kinase inhibitor library (<https://www.caymanchem.com>).

# Figure S8

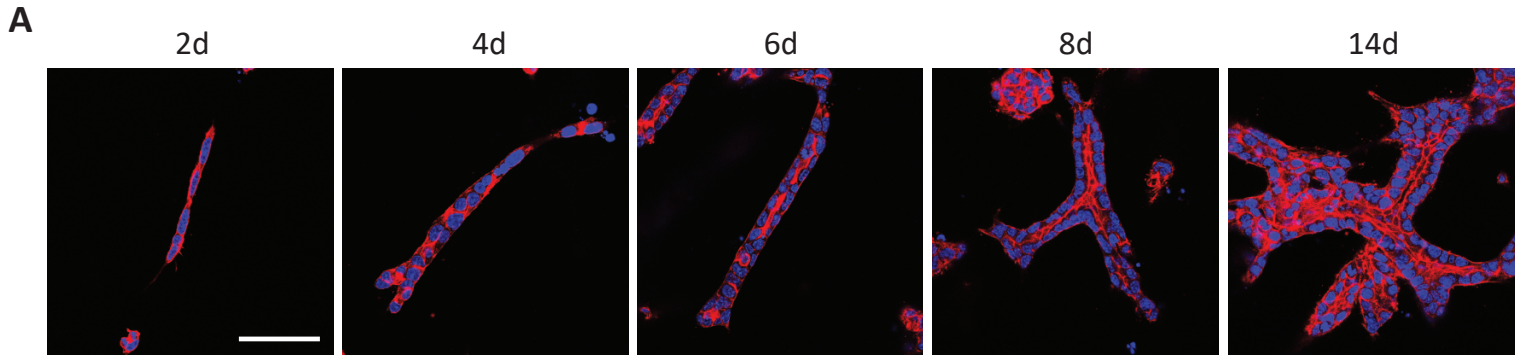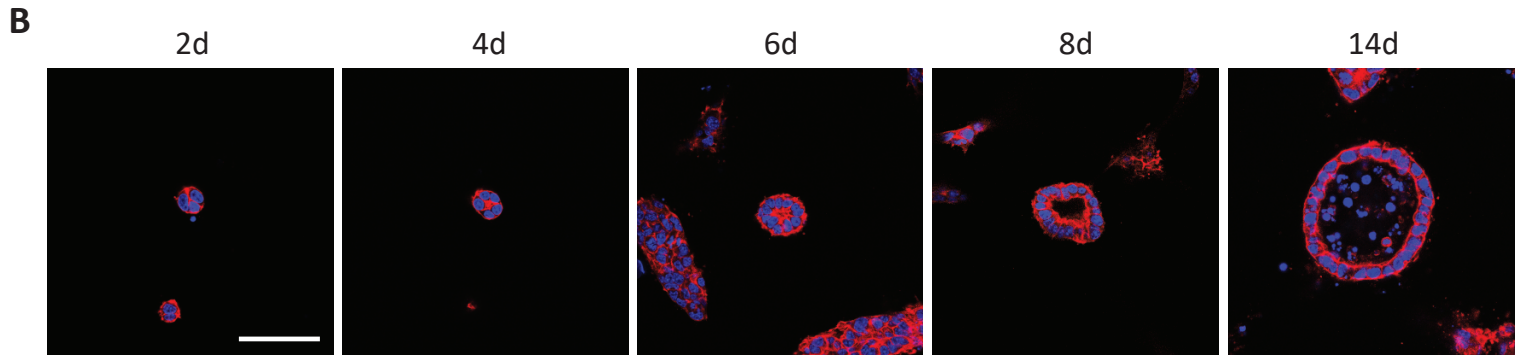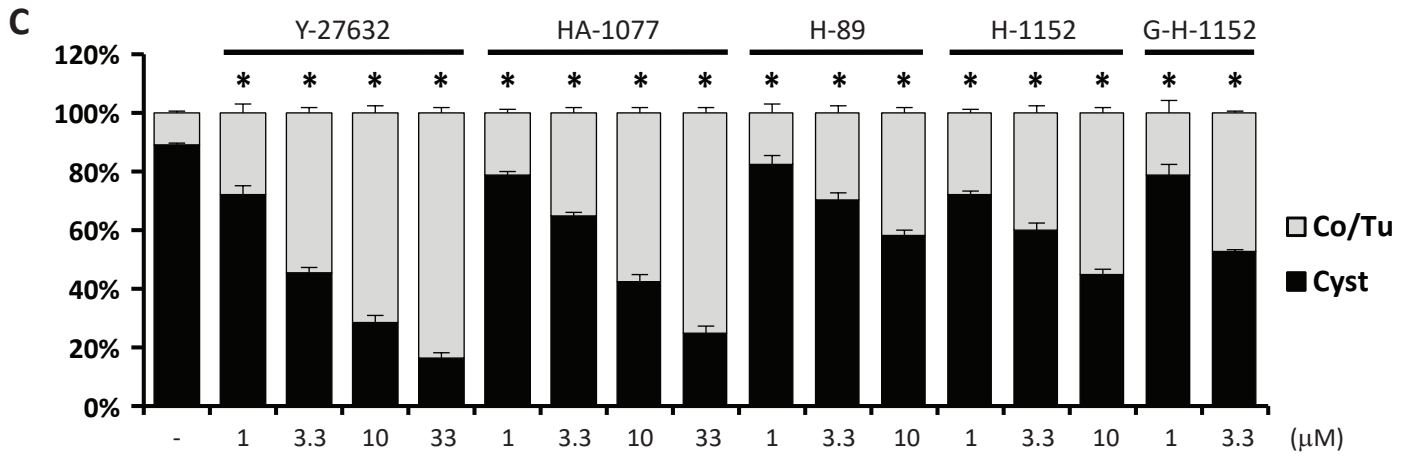

**D**

| Inhibitors        | Kinase target                                              |
|-------------------|------------------------------------------------------------|
| Y-27632           | <b>ROCK</b>                                                |
| HA-1077           | <b>ROCK</b> , PRK2, MSK1, MAPKAP-K1b                       |
| H-89              | S6K1, MSK1, PKA, <b>ROCK</b> , PKB $\alpha$ and MAPKAP-K1b |
| (S)-H-1152        | <b>ROCK</b>                                                |
| (S)-Glycyl-H-1152 | <b>ROCK</b>                                                |

**Figure S9. Generation of *Pkd1*, *RhoA* and *Larg* knockout mIMCD3 cells by CRISPR/Cas9.**

(A-C) Schematic representation of the mouse *Pkd1*, *RhoA* and *Larg* locus showing the sequence of small guide RNA (sgRNA, underlined) and protospacer adjacent motif (PAM, red color font). DNA sequencing of the induced mutations at the corresponding locus is also shown. When different mutations were induced in the same gene on the homologous chromosomes, both alleles (A & B) are shown.

(A) Characterization of two independent clones of *Pkd1* mutant mIMCD3 cells. Clone #1 was used for subsequent generation of *Pkd1*;*RhoA* or *Pkd1*;*Larg* double mutant cells.

(B) Characterization of two independent clones of *RhoA* mutant and two independent clones of *Pkd1*;*RhoA* double mutant mIMCD3 cells. Also shown is western blotting analysis of cell extracts confirming RhoA inactivation.

(C) Characterization of two independent clones of *Larg* mutant and two independent clones of *Pkd1*;*Larg* double mutant mIMCD3 cells. Also shown is western blotting analysis of cell extracts confirming LARG inactivation.

# Figure S9

**A**

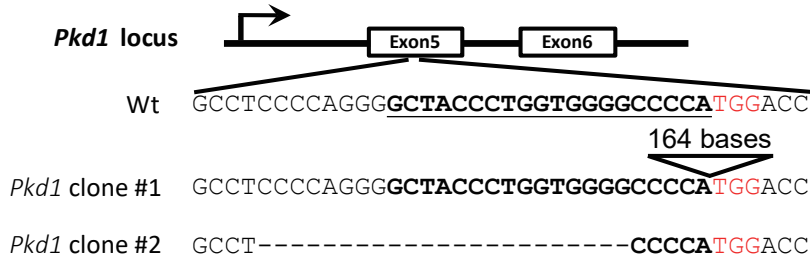

**B**

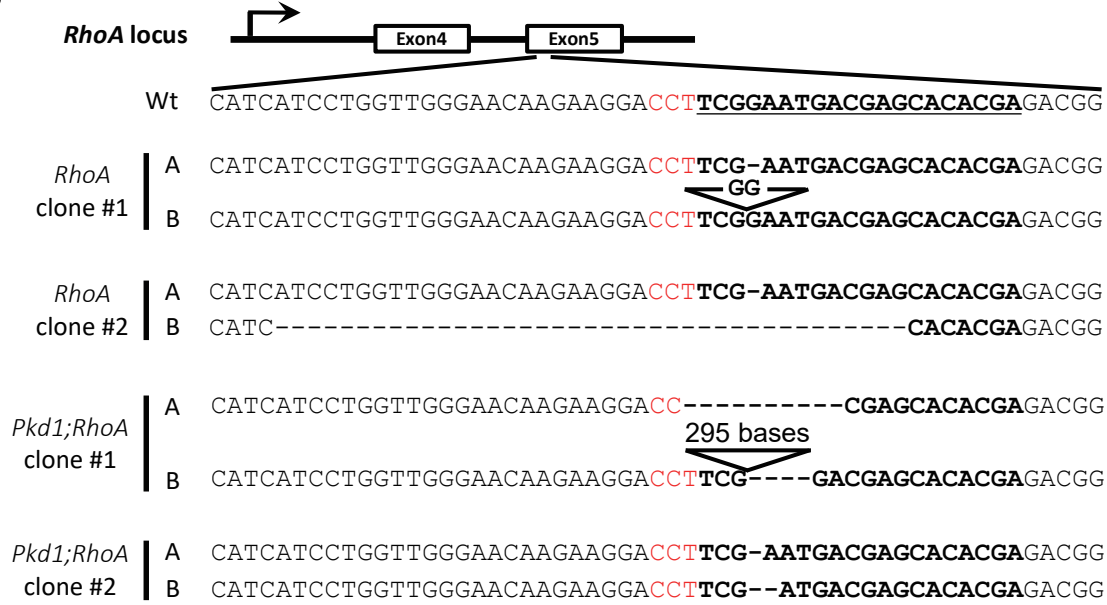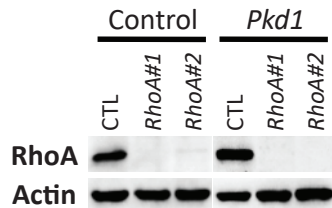

**C**

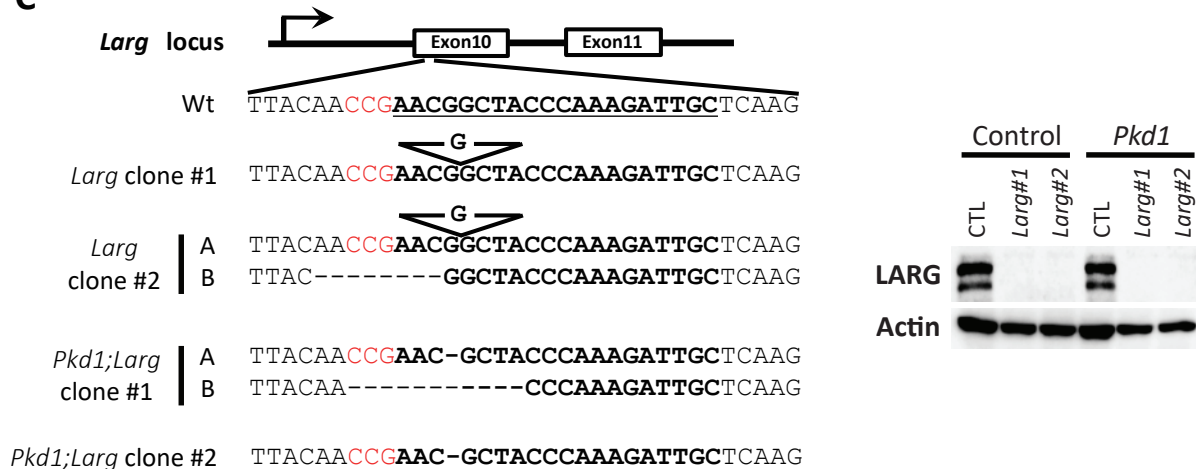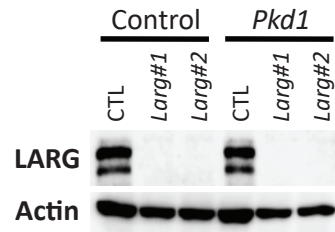

**Figure S10. The ROCK inhibitor Y-27632 suppresses YAP activity.**

(A) Western blot showing decreased phosphorylation of MLC and increased phosphorylation of Lats1/2 and YAP in mIMCD3 cells after 2 hours treatment with 50  $\mu$ M Y-27632.

(B) Downregulation of YAP transcriptional target genes in mIMCD3 cells after 2 hours treatment with 50  $\mu$ M Y-27632. Data are mean  $\pm$  SD. n = 3. (\*)  $P < 0.01$ ,  $t$ -test.

Figure S10

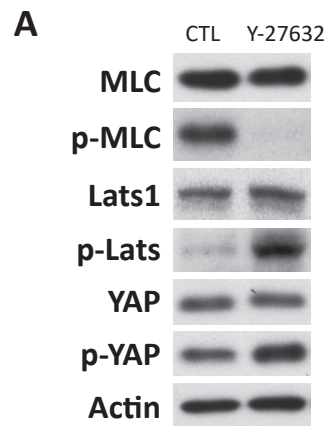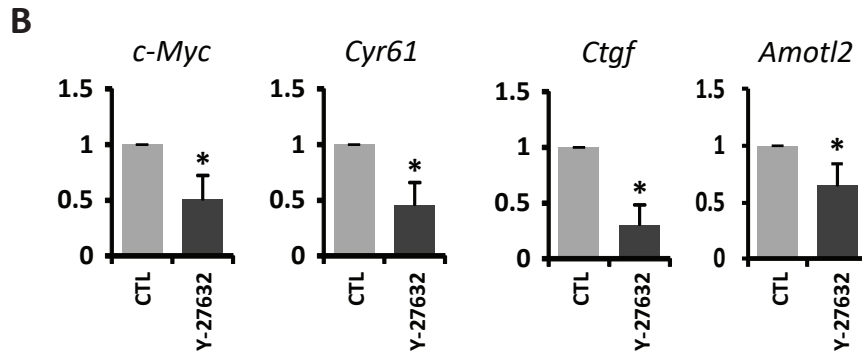

**Figure S11. Subcellular localization of several RhoGEFs in control and *Pkd1* mutant mouse kidneys.**

Staining of p115RhoGEF, AKAP13, p63RhoGEF, GEF-H1 and TRIO in control and *Pkd1* mutant kidneys as described in **Figure 1D**. Note the invariable cytoplasmic staining of all these RhoGEFs in control tubular epithelium and *Pkd1* mutant kidney cysts. Scale bar, 100  $\mu\text{m}$ .

Figure S11

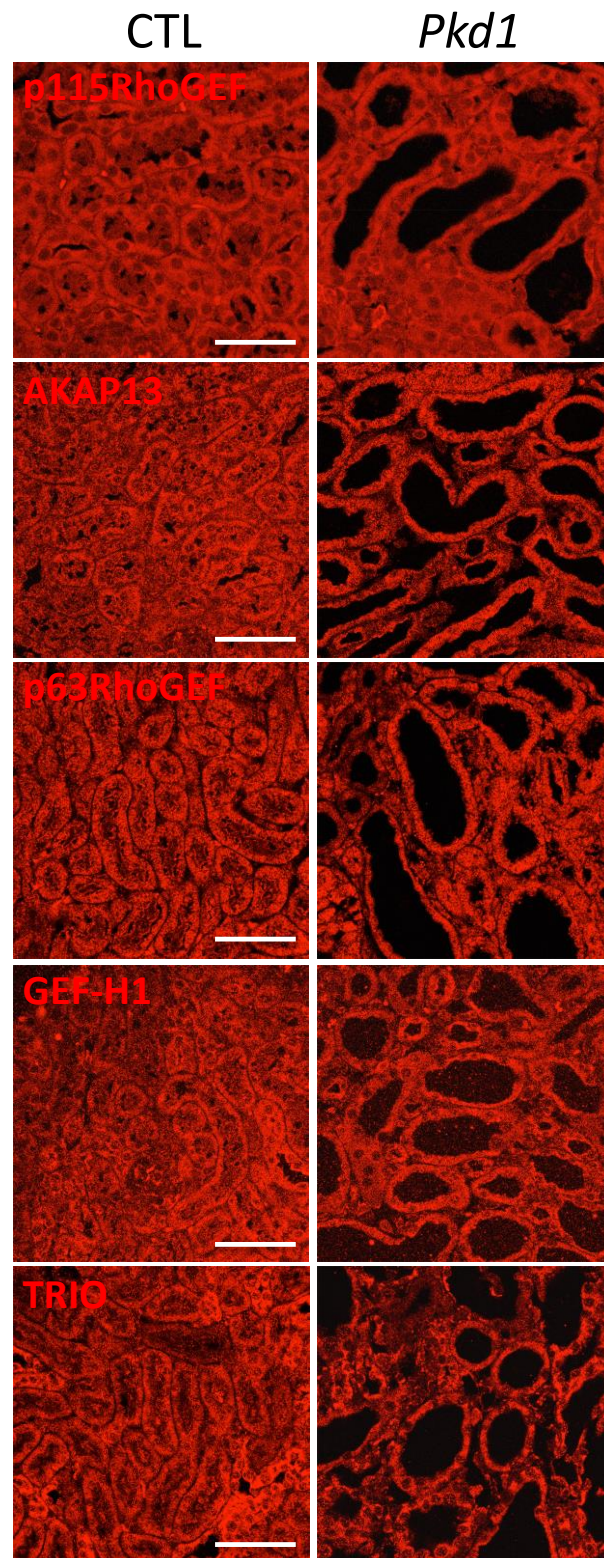

Supplement: supp_gad.315127.118_Supplemental_material.pdf [file supp_gad.315127.118_Supplemental_material.pdf]
